# Supplementary material for: A Psychometric Analysis of the Italian Version of the eHealth Literacy Scale Using Item Response and Classical Test Theory Methods
Source: PubMed Central journal article supplement (PMC5405289; doi:10.2196/jmir.6749), 2017-04-11
Supplement: jmir_v19i4e114_app1.pdf [file jmir_v19i4e114_app1.pdf]

Multimedia Appendix 1. The Italian version of the eHealth Literacy Scale (I-eHEALS).

| Item      | Italian translation <sup>a</sup>                                                                                                | Original version <sup>b</sup>                                                    |
|-----------|---------------------------------------------------------------------------------------------------------------------------------|----------------------------------------------------------------------------------|
| I-eHEALS1 | So come trovare informazioni utili riguardanti la salute in Internet                                                            | I know how to find helpful health resources on the Internet                      |
| I-eHEALS2 | So come utilizzare Internet per trovare risposte alle mie domande sulla salute                                                  | I know how to use the Internet to answer my health questions                     |
| I-eHEALS3 | So quali informazioni riguardanti la salute sono disponibili in Internet                                                        | I know what health resources are available on the Internet                       |
| I-eHEALS4 | So dove trovare informazioni utili riguardanti la salute in Internet                                                            | I know where to find helpful health resources on the Internet                    |
| I-eHEALS5 | So come utilizzare le informazioni riguardanti la salute trovate in Internet per aiutarmi                                       | I know how to use the health information I find on the Internet to help me       |
| I-eHEALS6 | Ho le competenze necessarie per valutare le informazioni riguardanti la salute che trovo in Internet                            | I have the skills I need to evaluate the health resources I find on the Internet |
| I-eHEALS7 | Sono in grado di distinguere informazioni riguardanti la salute di alta qualità da quelle di bassa qualità presenti in Internet | I can tell high quality from low quality health resources on the Internet        |
| I-eHEALS8 | Mi sento sicuro/a nell'utilizzare informazioni ottenute da Internet per prendere decisioni riguardanti la salute                | I feel confident in using information from the Internet to make health decisions |

Notes: <sup>a</sup> As in the English version, answers are on a 5-point Likert scale ranging from 1 = *In completo disaccordo* [Strongly disagree] to 5 = *Completamente d'accordo* [Strongly agree]; <sup>b</sup> Source: Norman, C. D., & Skinner, H. A. (2006a). eHEALS: The eHealth literacy scale. *Journal of Medical Internet Research*, 8(4), e27.
