# Supplementary material for: A Psychometric Analysis of the Italian Version of the eHealth Literacy Scale Using Item Response and Classical Test Theory Methods
Source: PubMed Central journal article supplement (PMC5405289; doi:10.2196/jmir.6749), 2017-04-11
Supplement: jmir_v19i4e114_app2.pdf [file jmir_v19i4e114_app2.pdf]

Multimedia Appendix 2. Overview of the scales used in the study

| Construct                                                           | Items                                                                                                                                                                                                                                                                                                                                                                                                                                                                                                                                                                                                                              | Response options                                      | Source   |
|---------------------------------------------------------------------|------------------------------------------------------------------------------------------------------------------------------------------------------------------------------------------------------------------------------------------------------------------------------------------------------------------------------------------------------------------------------------------------------------------------------------------------------------------------------------------------------------------------------------------------------------------------------------------------------------------------------------|-------------------------------------------------------|----------|
| Online health information seeking                                   | - How often do you get health information from the Internet?                                                                                                                                                                                                                                                                                                                                                                                                                                                                                                                                                                       | 5-point scale<br>(Less than once a month – Every day) | -        |
| Trust in the Internet as a source of health information             | - How much do you trust health information from the Internet?                                                                                                                                                                                                                                                                                                                                                                                                                                                                                                                                                                      | 5-point scale<br>(Not at all – Very much)             | -        |
| Attitudes towards the adoption of ICTs for health purposes          | - I am in favor of using the Internet for health-related purposes<br>- I am in favor of using social media (e.g., Facebook or Twitter) for health-related purposes                                                                                                                                                                                                                                                                                                                                                                                                                                                                 | 7-point scale<br>(Strongly disagree – Strongly agree) | -        |
| Use of Internet searching strategies                                | In order to find health information on the Internet you usually do the following:<br>- use a site that my physician recommended<br>- follow links that appear on websites<br>- ask questions in forums<br>- use my Favorites list<br>- use a site that a friend recommended                                                                                                                                                                                                                                                                                                                                                        | 5-point scale<br>(Never – Always)                     | [10]     |
| Perceived outcomes of seeking health information by surfing the net | Do you agree or disagree that seeking health information on the Internet...<br>- improved your ability to manage your health needs<br>- enabled you to ask your physician questions resulting from the information you acquired on the Internet<br>- enabled you to show your physician the information that you retrieved<br>- raised your sense of power in your encounter with the physician<br>- improved your understanding of the symptoms, conditions, or treatments in which you were interested<br>- updated your knowledge in health innovations<br>- led you to take independent steps (such as seeing a specialist, or | 5-point scale<br>(Strongly disagree – Strongly agree) | [10, 28] |

|                                     |                                                                                                                                                                                                                                                                                                                                                                                                                  |                                                                        |      |
|-------------------------------------|------------------------------------------------------------------------------------------------------------------------------------------------------------------------------------------------------------------------------------------------------------------------------------------------------------------------------------------------------------------------------------------------------------------|------------------------------------------------------------------------|------|
|                                     | <p>changing an exercise regimen or eating habits)</p> <ul style="list-style-type: none"> <li>- enabled you to think about alternative treatment options; and made you more aware of patients' insurance rights</li> </ul>                                                                                                                                                                                        |                                                                        |      |
| Use of Internet evaluation criteria | <p>How important are the 5 following criteria in judging a website:</p> <ul style="list-style-type: none"> <li>- the purpose of the site is clearly stated and the information is accurate</li> <li>- it has a reliable source; a contact is available for questions/comments/help</li> <li>- retrieval is easy and can be done in a timely manner</li> <li>- the scope of information suits my needs</li> </ul> | 5-point scale<br>(Not at all important – Very important)               | [29] |
| Predisposition towards eHealth      | <ul style="list-style-type: none"> <li>- How useful do you feel the Internet is in helping you in making decisions about your health?</li> <li>- How important is it for you to be able to access health resources on the Internet?</li> </ul>                                                                                                                                                                   | 5-point scale<br>(Not at all useful/important – Very useful/important) | [7]  |

---
